# Supplementary material
Source: PubMed Central journal article supplement (PMC1180710)

## Supplementary data

### Effects of antibodies against dynein and $\gamma$ -tubulin on microtubule organization in $\gamma$ -Tu-M-expressed extracts

Microtubules are shown in red and  $\gamma$ -Tu-M-GFP is shown in green. **(A)** Effect of anti-dynein antibody. Extracts from oocytes injected with  $\gamma$ -Tu-M mRNA were incubated with taxol and anti-dynein antibody. **(B)** Effect of anti- $\gamma$ -tubulin antibody.  $\gamma$ -Tu-M-overexpressed extracts were incubated with taxol and anti- $\gamma$ -tubulin rabbit antibody that does not recognize  $\gamma$ -Tu-M. Similar results were obtained from two independent experiments.

**Kotani and Yamashita, Supplementary data**

Anti-Dynein

Anti- $\gamma$ -Tu

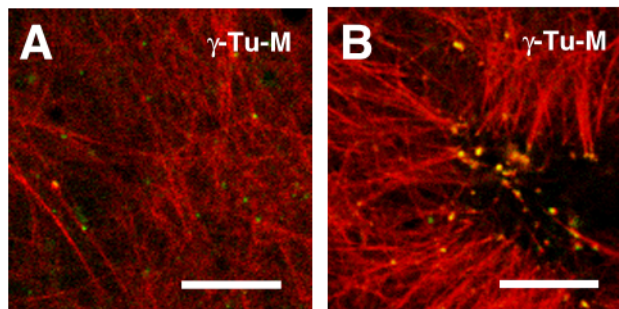

Supplement: bj3890611add.pdf [file bj3890611add.pdf]
